# Supplementary figures and images for: Expression of nicotinamide N-methyltransferase in hepatocellular carcinoma is associated with poor prognosis
Source: Springer Nature journal article supplement (doi:10.1186/1756-9966-28-20), 2009-02-01

Expression level of  
NNMT / Reference genes

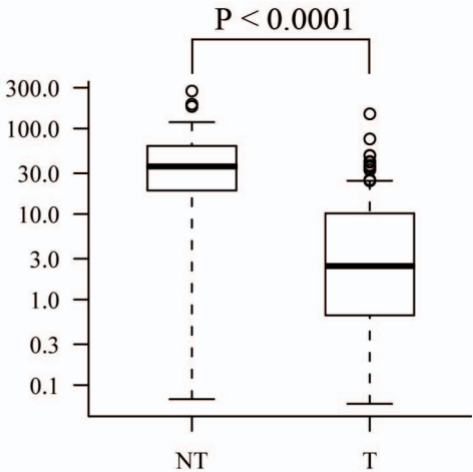

Supplement: 13046_2009_107_MOESM1_ESM.pdf [file 13046_2009_107_MOESM1_ESM.pdf]
